# Supplementary material for: Fabrication of novel mixed matrix polymer electrolyte membranes (PEMs) intended for renewable hydrogen production via electrolysis application
Source: Royal Society of Chemistry journal article supplement (doi:10.1039/d3ya00503h), 2024-01-01
Supplement: d3ya00503h1.pdf [file d3ya00503h1.pdf]

1  
2  
3  
4  
5  
6  
7  
8  
9  
10  
11  
12  
13  
14  
15  
16  
17  
18  
19  
20  
21  
22  
23

## Supporting Information (SI)

Fabrication of the novel mixed matrix Polymer Electrolyte Membranes (PEMs) intended for renewable hydrogen production via electrolysis application

Relebohile Mokete<sup>1\*</sup>, František Mikšík<sup>2,3</sup>, Roman Selyanchyn<sup>2</sup>, Nobuo Takata<sup>1</sup>, Kyaw Thu<sup>1,2</sup>, Takahiko Miyazaki<sup>1,2</sup>

<sup>1</sup> Department of Energy and Environmental Engineering, Interdisciplinary Graduate School of Engineering Sciences, Kyushu University, 6-1 Kasuga-koen, Kasuga-shi, Fukuoka 816-8580, Japan

<sup>2</sup> Research Center for Next Generation Refrigerant Properties (NEXT-RP), International Institute of Carbon-Neutral Energy Research (I2CNER), Kyushu University, 744 Motoooka, Nishi-ku, Fukuoka 819-0395, Japan

<sup>3</sup> Institute of Innovation for Future Society, Nagoya University Furu-cho, Chikusa, Nagoya 464-8603, Japan

\*Corresponding author email: [relemokete@kyudai.jp](mailto:relemokete@kyudai.jp)

## 24 1. Thermodynamic parameters and efficiency determination

25 The thermodynamic parameters involved in water electrolysis (WE) such as  
26 change in enthalpy ( $\Delta H^\circ$ ), Gibbs free energy ( $\Delta G^\circ$ ), and entropy ( $T\Delta S^\circ$ )  
27 depict the amount of energy required for water electrolysis. This includes the  
28 minimum reversible work necessary to split water and the thermal energy  
29 that is unavailable to participate in the reaction but rather supplied as heat [1,  
30 2]. The relationship between these parameters is shown in equation S1 and  
31 can be further associated with water, hydrogen, and oxygen as ideal gases at  
32 standard conditions (temperature = 298 K and pressure =  $10^5$  Pascal) where  
33  $\Delta H^\circ = 286 \text{ kJ mol}^{-1}$  and  $\Delta G^\circ = 237 \text{ kJ mol}^{-1}$  [3, 4].

34

$$\Delta H^\circ = \Delta G^\circ + T\Delta S^\circ \quad \text{S1}$$

35

36 Therefore, the reversible voltage ( $V_{\text{rev}}$ ) that drives water splitting can be  
37 calculated using  $\Delta G^\circ$  (equation S2), where  $n$  and  $F$  are respectively the  
38 numbers of transferred charges for each  $\text{H}_2$  molecule ( $n = 2$ ) and  $F$  is  
39 Faraday's constant ( $F = 96485 \text{ C mol}^{-1}$ ). When the conditions are not ideal,  
40 the atmospheric pressure and temperature of electrolyzers are usually below  
41  $80^\circ\text{C}$ , hence, some extra energy is required for water splitting. The  
42 thermoneutral potential is used to express the energy that corresponds to the  
43 reversible potential. Therefore, the expression of thermoneutral potential  
44 ( $V_{\text{tn}}$ ) is represented in terms of  $\Delta H^\circ$  by equation S3 where  $n$  and  $F$  imply  
45 similar parameters mentioned previously [2, 4].

46

$$V_{\text{rev}} = \frac{\Delta G^\circ}{nF} = \frac{237000}{2 \times 96485} = 1.23\text{V} \quad \text{S2}$$

$$V_{\text{tn}} = \frac{\Delta H^\circ}{nF} = \frac{286000}{2 \times 96485} = 1.48\text{V} \quad \text{S3}$$

47

48 The electrolyzer's voltage is commonly expressed according to equation S4  
 49 where  $V_{act}$ ,  $V_{ohm}$ , and  $E$  represent activation polarization, ohmic polarization,  
 50 and open-circuit voltage, respectively. Therefore,  $E$  is calculated with respect  
 51 to equation 8 where  $R$ ,  $T_{elec.}$ ,  $F$ , and  $a_{H_2O}$  symbolise universal gas constant,  
 52 Faraday's constant, the temperature of the electrolyzer, and water activity  
 53 between the anode and electrolyte, respectively [5-7]:

54

$$V_{elec} = V_{act} + V_{ohm} + E \quad S4$$

$$E = E_0 + \frac{RT_{elec.}}{2F} \ln \left( \frac{P_{H_2} \times P_{O_2}^{0.5}}{a_{H_2O}} \right) \quad S5$$

55

56  $E_0$  ( $V_{rev}$ ) is the standard voltage calculated following equation S2. The  
 57 activation potential is denoted by equation S6. Here,  $i$ ,  $i_0$  and  $\alpha$  refer to  
 58 current density, exchange current density and charge transfer coefficient,  
 59 respectively. The membrane resistance and ohmic potential are also denoted  
 60 by equations S7 and S8, where  $\sigma_m$  and  $t_m$  represent membrane conductivity  
 61 as well as thickness, respectively [6].

62

$$V_{act} = V_{rev} + \frac{RT_{elec.}}{2F} \ln \left( \frac{i}{i_0} \right) \quad S6$$

$$R_{ohm} = \frac{t_m}{\sigma_m} \quad S7$$

$$V_{\Omega} = iR_{ohm} \quad S8$$

63

64 The energy efficiency ( $\eta_{eff}$  %) of a cell can be calculated based on the energy  
 65 provided from the  $H_2$  production and expressed in terms of the higher heating

66 value of  $H_2$  ( $HHV_{H_2}$ ) divided by the consumed energy which is a product of  
67 current (I), voltage (V) and the time (t) it took for  $H_2$  to be produced  
68 (Equation S9) [2].

69

$$\eta_{\text{eff}} \% = \frac{\text{moles } H_2 \text{ produced} \times HHV_{H_2}}{I \times V \times t} \times 100\% \quad \text{S9}$$

70 The energy efficiency ( $\eta_{\text{energy}} \%$ ) is also calculated by the ratio between the  
71 energy content of  $H_2$  and the amount of electrical energy necessary (Equation  
72 S10). In equation S10,  $H_{H_2}$  (equivalent to 11 929 kJ/m<sup>3</sup>) represents the  
73 calorific value of  $H_2$  at temperature = 20°C, I is current in mA, t is time  
74 (seconds) and  $V_{H_2}$  is the experimental volume of  $H_2$  (mL) [8, 9].

75

$$\eta_{\text{energy}} \% = \frac{H_{H_2} \times V_{H_2 \text{ experimental}}}{U \times I \times t} \times 100\% \quad \text{S10}$$

76

## 77 **2. PEM transformation during fabrication**

78 The transformation of the membranes during preparation is represented by  
79 CT-M in Fig S1. The dried PEMs before cross-linking looked transparent  
80 (Fig. S1. a), but they became dark brown and opaque immediately after  
81 cross-linking (Fig. S1. b), whereas the reacted membranes still maintained  
82 their structure (Fig. S1. c).

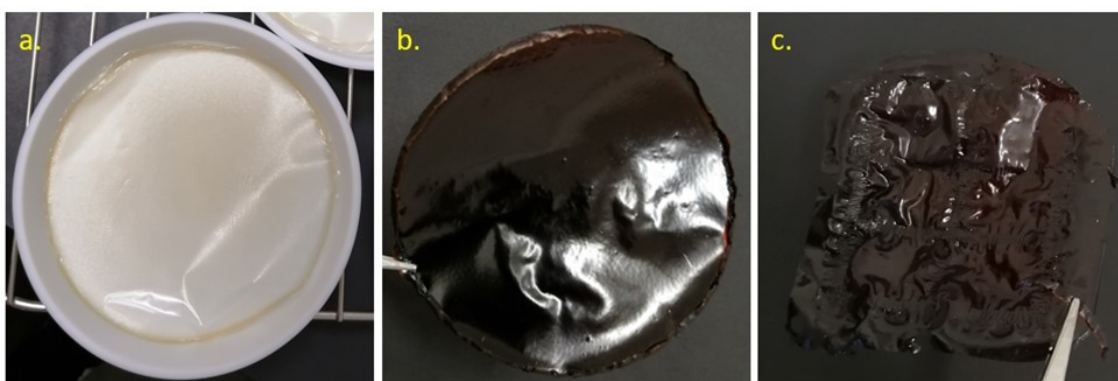

83

84 Fig. S1. The representative membrane for the fabricated PEMs after drying  
85 but before cross-linking (a), after cross-linking (b) and after electrolysis  
86 experiment (c). Fabricated PEM parameters: matrix: PVA-PVP (1:1),  
87 cross-linker: SSA, cross-linking temperature (°C): 120, cross-linking time  
88 (hours): 3, drying temperature (°C): 40, drying time (hours): 24, filler: CT

89

90

91

92 **3. FT/IR**

93 The FT/IR spectrum identification is on Table S1.

94

95

**Table S1: FT/IR spectra identification**

| Peak identification<br>Group         | Wavenumber (cm <sup>-1</sup> ) |                                                                                                                         |
|--------------------------------------|--------------------------------|-------------------------------------------------------------------------------------------------------------------------|
|                                      | Current study                  | Reference study                                                                                                         |
| O-H (hydroxyl group)                 | 3386<br>3591                   | 1423–1417 [10]<br>3300 [11]<br>3320 [12]<br>3342 [13]<br>3000-3600 [14]<br>3350-3500 [15]<br>3700-3200 [10]             |
| C-H (alkyl group)                    | 862<br>2920<br>2965<br>1126    | 1115 [11],<br>2850, 2950 [11]<br>2910 [16],2928[12,13], 2920<br>[14]<br>1000-500 [10]<br>844, 2942 [16]<br><br>897 [17] |
| C-O (alkyl phenol<br>group)          | 1030<br>1043<br>1047<br>1226   | 1040 [11]<br>1021 [13]<br>1035, 1281 [12]<br>1033 [14]<br>1091 [16]<br>1213 [15]<br>1223, 1247 [18]                     |
| C=O (carbonyl,<br>carboxylic groups) | 1269<br>1604<br>1740           | 1270 [4 13],<br>1631 [4],1635 [5 14]<br>1740-1610 [10]<br>1656, 1721 [16]                                               |
| C=C (alkene)                         | 1509                           | 1601, 1512 [12,18]<br>1650-1500 [10]                                                                                    |

|                                        |   |                             |
|----------------------------------------|---|-----------------------------|
| -CH <sub>2</sub> (methylene group)     | - | 1415 [16]<br>1426 [17]      |
| -CH <sub>3</sub> (methyl group)        | - | 1331 [16]                   |
| -SO <sub>3</sub> (sulfonic acid group) | - | 1250 [19]<br>1100-1250 [20] |

96

97

98 **4. Water physisorption isotherms**

99 The water adsorption (physisorption) isotherm classification is according to  
100 Table S2 [21-23].

101 **Table S2: Physisorption Isotherms Classification**

| Isotherm | Characterization                                                                                                                                                                                                                                                                                                                       | Illustration |
|----------|----------------------------------------------------------------------------------------------------------------------------------------------------------------------------------------------------------------------------------------------------------------------------------------------------------------------------------------|--------------|
| Type I   | <ul style="list-style-type: none"> <li>■ Concave to P/P<sub>0</sub></li> <li>■ Pore accessibility limits water uptake instead of the internal surface</li> <li>■ Exhibited by microporous adsorbents (narrow micropores; type I(a) and wider micropores type I(b))</li> <li>■ e.g activated carbon, Zeolite, porous oxides)</li> </ul> |              |
| Type II  | <ul style="list-style-type: none"> <li>■ Happens in non-porous or macroporous adsorbents</li> <li>■ Monolayer occurs and multilayer sorption happens at a higher relative pressure</li> <li>■ e.g non-porous alumina and silica</li> </ul>                                                                                             |              |

- 
- Type III ■ Materials exhibiting weak adsorbate and adsorbent interactions  
■ No monolayer formation  
■ Adsorbed molecules clustered around sites preferable surface sites  
■ e.g (Graphite and water)
- Type IV ■ Occurs in mesoporous and non-porous materials  
■ Capillary condensation is followed by hysteresis (type IV(a) and smaller width adsorbents undergo type IV(b))  
■ Multilayer sorption manifests  
■ e.g (Mesoporous alumina and silica)
- Type V ■ Exhibited by both hydrophobic microporous and mesoporous materials with weak adsorbate and adsorbent interactions  
■ e.g Activated carbon, water
- Type VI ■ Involves sequential multi-layer sorption on homogeneous surface materials  
■ e.g Graphite/Krypton or Graphite/argon
- 

102

103



## 104 **5. Membrane characterization**

### 105 **5. 1 Proton conductivity comparison**

106 For the proton conductivity comparison, many studies reported various  
107 values depending on the study aim. For instance, Liu et al. [24] developed  
108 the low-cost PEMs for direct methanol adsorption. The PEMs were  
109 fabricated using a blend of PVA/HFA (PVA/hexafluoroglutaric acid) plus  
110 BASANa (Benzenesulfonic acid sodium salt) and GA (Glutaraldehyde) as  
111 binary reaction agents. The range of the proton conductivity obtained from  
112 Liu et al.'s study [24] was within the range of  $10^{-3}$  to  $10^{-2}$  S/cm and the  
113 fabricated PEMs exhibited lower proton conductivity compared to that of  
114 Nafion™ 115. According to the literature, Ebenezer et al [25] reported the  
115 proton conductivity of the Nafion™ 115 membrane to be 0.14 S/cm under  
116 humidified conditions whereas it was 0.1 S/cm at room temperature while  
117 that of PVA-SSA was 0.077 S/cm under humidified conditions [25]. In  
118 another study by Kamaroddin et al [26], Nafion exhibited the proton  
119 conductivity of 10.06 mS/cm at 90 °C. A study by Kamjornsupamitr et al.  
120 [27] found the proton conductivity of the glutaraldehyde (0.5M) cross-linked  
121 PVA/SSA (molar ratio 1:0.2) to be 0.034 S/cm while that of Nafion at 30 °C  
122 and 100% relative humidity was 0.1 S/cm which was the highest  
123 comparatively. Furthermore, PVA/SSA membranes prepared by Rhim et al.  
124 [28] had the proton conductivities in the range of  $10^{-2}$  -  $10^{-3}$  S/cm. In another  
125 study by Tasarin et al. [29], the pristine PVA-SSA had the proton  
126 conductivity of 2.7 mS/cm and 2.3 mS/cm at the respective temperatures of  
127 27 °C and 80 °C under non-humidified conditions. According to Zhu et al.  
128 [30], the proton conductivities of the water molecules plus sulfonic acid  
129 groups are around 10 – 100 mS/cm while the activation energy is around 0.1  
130 and 0.5 eV because of hydration levels.

131

### 132 **5. 2 Ion Exchange capacity (IEC), water uptake (WU) and swelling** 133 **ratio (SR)**

134 In addition to the water adsorption experiments, the ion exchange capacity  
135 (IEC), water uptake (WU) based on mass change and swelling ratio (SR)  
136 with respect to thickness were determined (Fig. S3). NF-M had the lowest  
137 values of the IEC (1.2 meq. g<sup>-1</sup>), WU (11%), and SR (19.9%) whereas PB  
138 (IEC = 4.1 meq. g<sup>-1</sup>, WU = 133.7%, and SR = 34.4%) outperformed SSA-M  
139 (IEC = 1.8 meq. g<sup>-1</sup>, WU = 121.7% and SR = 26.4%) and CT (IEC = 2.3

140 meq. g<sup>-1</sup>, WU = 114% and SR = 22.1%) respectively. The IEC, WU based  
 141 on mass % change and thickness-related SR for the fabricated PEMs were  
 142 analysed and the results are reported below (Fig. S3). The comparison of  
 143 WU, SR and IEC for NF with other studies is shown on Table S3, and the  
 144 reported IEC is 0.89-1.3 meq. g<sup>-1</sup>, WU is 7.3-31.5%, while the SR is 30-  
 145 53.9% but the results vary depending on the NF membrane type, thickness  
 146 and temperature conditions [31-34]. A very interesting outcome is that of  
 147 CT-M where the IEC was higher than that of SSA-M, but the WU and SR  
 148 were the least (Fig. S3). Accordingly, the least WU and SR of the CT-M may  
 149 be attributed to a combination of intense hydrophilicity of the terminal  
 150 sulfonic acid groups on the polymer backbone and the degree of  
 151 hydrophobicity within the PEM, which results in hydrophilic/hydrophobic  
 152 separation on the surface [34]. After the incorporation of fillers, there is a  
 153 reduction of sulfonic groups but the incorporation of additional groups from  
 154 the filler, so the filler properties also play a role in determining the WU and  
 155 water retention. Thus in the case of CT-M, the proton transport via vehicular  
 156 mechanism was affected in the presence of the filler [33]. Although WU and  
 157 SR are associated with proton conduction, orientation of internal and  
 158 terminal groups also determines the degree of transport within the PEM as  
 159 well as the hydrophilicity of the functional groups [34].

160  
 161

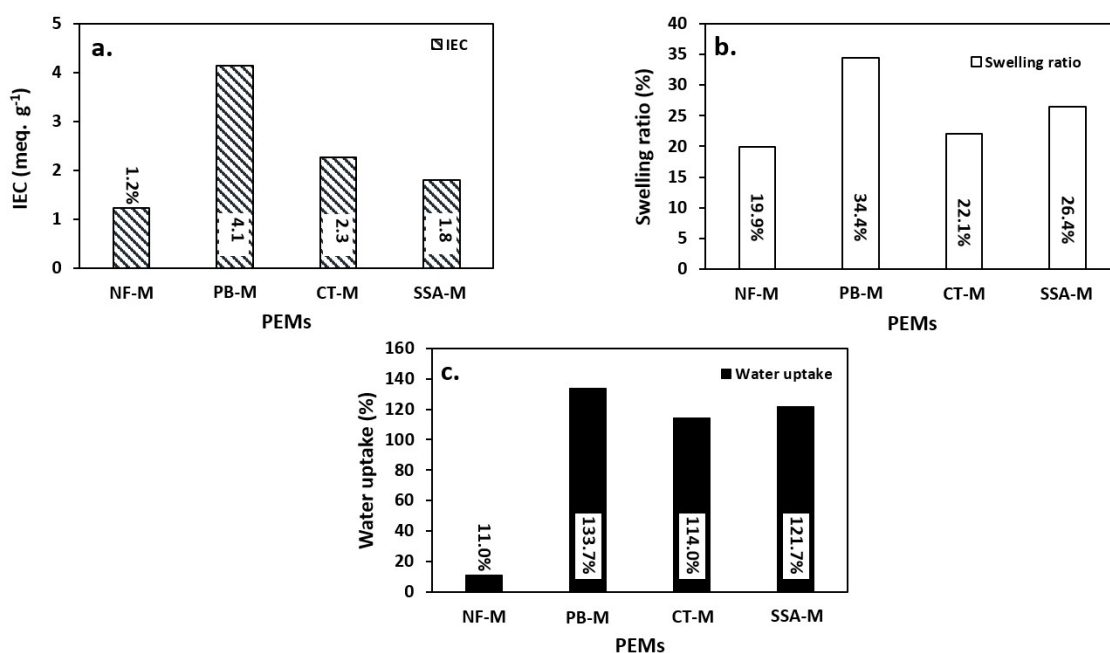

162  
 163

164 Fig. S3. Water uptake and swelling ratio of the PEMs: NF, PB, CT and  
 165 SSA. Experimental parameters: titrate: NaCl (1M), titrant: NaOH (0.1M),  
 166 PEMs drying temperature (°C): 70, soaking time in DI water (hour): 4,  
 167 PEMs' area (cm<sup>2</sup>): 1  
 168

169 Comparison with the literature was also done and the reference results are  
 170 shown in table S3.

171 **Table S3: Comparison of IEC, water uptake and swelling ratio of the**  
 172 **PEMs from the literature**

| PEM                            | Temp.<br>(°C) | WU<br>(%) | SR<br>(%) | IEC<br>(meq.<br>g <sup>-1</sup> ) | T<br>(μm) | PC<br>(mS/cm) |
|--------------------------------|---------------|-----------|-----------|-----------------------------------|-----------|---------------|
| NF211 [31]                     | 30            | 7.3       | 30.0      | 0.89                              | 25        | 70            |
|                                | 90            | 18.1      | 53.9      | 0.89                              | 25        | 135.6         |
| NF212[16]<br>[35]              | 25            | -         | -         | -                                 | 0.02      | 0.125         |
|                                | 100           | -         | -         | -                                 | -         | 100           |
| NF117 [34]                     | 25            | 28.51     | -         | 0.91                              | -         | 29.5          |
| NF (5% wt<br>solution)<br>[33] | 110           | 18        | -         | 1.3                               | -         | 1.8           |
| NF112 [32]                     | -             | -         | -         | 0.91                              | 80        | -             |
| NF115 [32]                     | -             | -         | -         | 0.91                              | 125       | -             |
| NF117 [32]                     | -             | 31.5      | -         | 0.91                              | 175       | 100           |
| NMPC/PV<br>A [35]              | -             | 51        | -         | 0.56                              | -         | -             |
| PVA [36]                       | -             | 50.73     | 18        | 0.25                              | 24        | -             |
| PVA/SSA<br>[29]                | 27            | -         | -         | 2.25                              | -         | 2.7           |

|                               |     |                 |   |                 |             |                        |
|-------------------------------|-----|-----------------|---|-----------------|-------------|------------------------|
| <b>PVA/SSA</b><br><b>[25]</b> | 25  | -               | - | -               | 200         | 77                     |
| <b>PVA/SSA</b><br><b>[27]</b> | 27  | 54.6            | - | 3.49            |             | 34.4                   |
| <b>PVA/HFA</b><br><b>[24]</b> | <60 | 25.12-<br>160.9 | - | 0.632-<br>1.158 | 100-<br>250 | 14.2-62.7<br>13.9-56.3 |
|                               | >60 |                 |   | 0.621-<br>1.043 |             |                        |

173

174 Proton Exchange Membrane (PEM), Temperature (Temp.), Water uptake  
 175 (WU), swelling ratio (SR), Ion exchange capacity (IEC), Thickness (T) and  
 176 Proton conductivity (PC), Nafion (NF), N-methylene phosphonic  
 177 chitosan/poly vinyl alcohol (NMPC/PVA), poly (vinyl  
 178 alcohol)/hexafluoroglutaric acid (PVA/HFA), references are written in  
 179 brackets [].

180

## 181 **6. Mechanical properties**

182 Some physico-mechanical properties include tensile strength (TS), tensile  
 183 modulus (TM) as well as elongation break (EB). Therefore, in  
 184 correspondence to the manufacturer's specifications (Fuel cell Earth), NF-M  
 185 had the TS, TM and EB of 43 MPa, 249 MPa, and 1.98% respectively at 50%  
 186 relative humidity and 23 °C [37]. The PVA-PVP-SSA cross-linked PEMs  
 187 had the respective TS, TM and EB of 60 MPa, 2.1 MPa and EB of 3.2% [38].  
 188 The TS of the membranes is higher than that of Nafion<sup>TM</sup> 115, consistent  
 189 with the findings from other studies [39]. The higher tensile strength implies  
 190 increased rigidity of the PEM [40]. Also, the more porous the material, the  
 191 lower the tensile strength and the more ductile it becomes [41]. In a typical  
 192 PVA-SSA PEM application study, the TS and EB of PVA-SSA to be 145  
 193 MPa and 24.7% respectively [41].

194

## 195 **7. Gel fraction**

196 The gel fraction (GF) is a measure of the degree of cross-linking within the  
197 polymer network [42]. It is regarded as the insoluble membrane,  
198 while the swollen polymer part upon contact with the solvent is known as  
199 the SR [43].

200 To determine the gel fraction, following Elzubair et al. [43] and Gulenoor et  
201 al. [44], the PEM samples were cut into 1cm × 1cm and dried for 2 hours at  
202 60 °C ( $W_a$ ). They were then placed in DI water for 24 hours at 25 °C so as to  
203 get rid of the soluble fraction. Subsequently, the membranes were dried again  
204 at 60 °C for 2 hours ( $W_b$ ). The gel fraction was calculated according to  
205 equation S11 below

206 [43, 44].

207

$$\text{Gel fraction (\%)} = \frac{W_b}{W_a} \times 100\% \quad \text{S11}$$

208

209 **Table S4: Gel fraction results of the fabricated PEMs**

| PEM   | Gel Fraction (%) |
|-------|------------------|
| SSA-M | 75.5             |
| PB-M  | 81.7             |
| CT-M  | 78.9             |

210

211 The gel fractions of PB-M, CT-M and SSA-M were found to be 81.7%,  
212 78.9%, and 75.5% respectively (Table S4). Comparatively, the degree of  
213 cross-linking in PB-M was higher due to the compact polymer network,  
214 leading to improved properties [42]. However, it has been revealed that high  
215 cross-linking does not always guarantee the best results because sometimes  
216 excessive crosslinking reduces the network penetration effects [39]. The  
217 material's properties also play a significant role as CT-M had a slightly lower  
218 GF, implying that the CT filler did not yield the best results. The Nafion's  
219 GF has been reported as 16% and this may be due to the nature of the  
220 membrane which is soft and gel-like as opposed to the rest of the membrane  
221 that are brittle when dehydrated [30, 42, 45].

222

## 223 8. Biofilter properties

224 The biofilter technology is based on the concept of absorption, adsorption or  
225 bio-oxidation by the biofilter media [46]. Therefore, the filler materials and  
226 the PEMs possess biofilter properties due to the presence of the functional  
227 sites [47]. Consequently, the various compounds become absorbed on the  
228 moisture film of the biofilters, thus water is necessary to maintain the  
229 moisture [46, 47]. When tested, PB was found to have a smoke removal  
230 efficiency of 100% whereas the pine wood chips removed odour from the  
231 nursing pig house air by 74% [46, 47]. This demonstrates that PEMs can  
232 function as biofilters, and the FT/IR results, along with water vapour  
233 properties support the verification of biofilter properties in the PEMs due to  
234 the presence of functional sites. Further in-depth research is still needed to  
235 fully understand the biofilter properties of the PEMs.

236

## 237 9. Nafion's formula

238 The chemical formula of Nafion is shown in Fig. S4 [48].

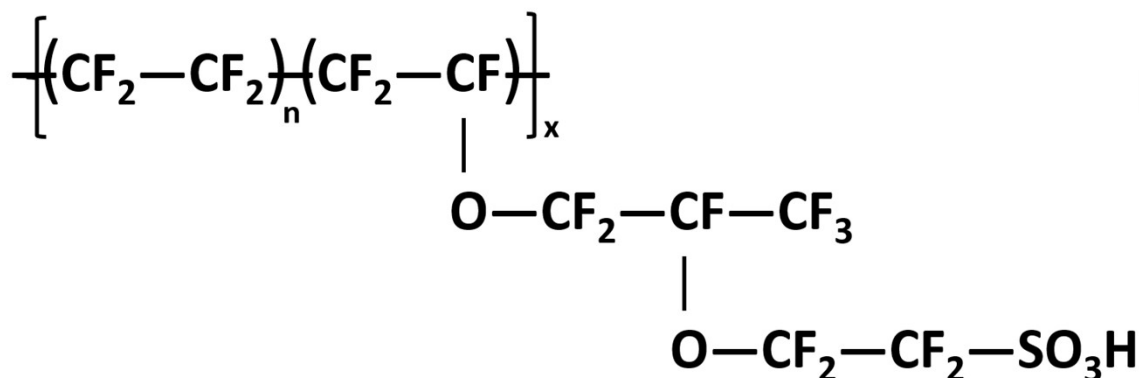

239

240 Fig. S4: Chemical formula of Nafion

241

## 242 10. Intrinsic properties of fillers

243 As aforementioned, the main fillers utilized include PB and CT. Considering  
244 their intrinsic properties, PB contains various phenolic compounds that  
245 determine its overall characteristics. Some of the phenolic compounds found  
246 in PB include catechin, ferulic acid, taxifolin and caffeic acid (Fig. S5 a-d)

247 [13]. The general properties of finely crushed PB (<10mm) and coarsely  
248 crushed PB (<20mm) are outlined in Table S5 [46].

249

250 **Table S5: Intrinsic properties of PB**

| Property                   | Fine PB | Coarse PB |
|----------------------------|---------|-----------|
| Air filled pores (%)       | 51      | 56        |
| Bulk density (kg/m         | 0.34    | 0.44      |
| Total nitrogen (mg<br>N/g) | 2.2     | 1.8       |

251

252 Based on the N<sub>2</sub> adsorption isotherms of PB at 77K, the specific surface area  
253 (S<sub>BET</sub> (m<sup>2</sup>/g)), pore volume (cm<sup>3</sup>/g), average pore diameter (Å), real density  
254 (g/cm<sup>3</sup>) and median particle size (mm) were 4.95, 0.006, 49.7, 1.1, and 0.152  
255 respectively [13].

256

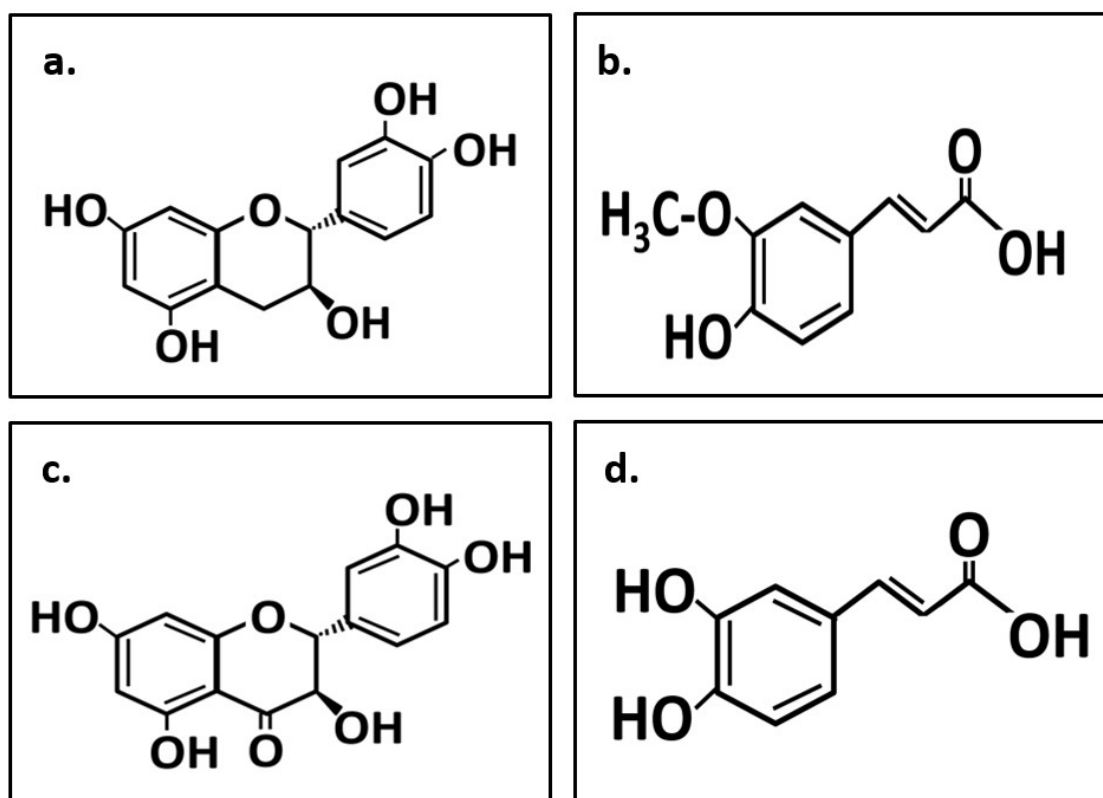

257

258 Fig. S5. Schemes of phenolic compounds extracted from PB including a.  
259 Catechin, b. Ferulic acid, c. Taxifolin, d. Caffeic acid

260

261 In terms of CT, the chemical extracts present in the seeds include  
262 hemicellulose (38.6%) and alpha-cellulose (18.9%) [49]. The CT seed  
263 capsule forms 22.81% of the whole seed [50]. Also, C- lignin is a biopolymer  
264 with strong acid resistance and it is a homogeneous linear polymer naturally  
265 found in plant seeds shells such as CT seeds [51].

266

267

268

269

270

271

272

273

274

275

276

277

278

279

280

281

282

283

284

285

286

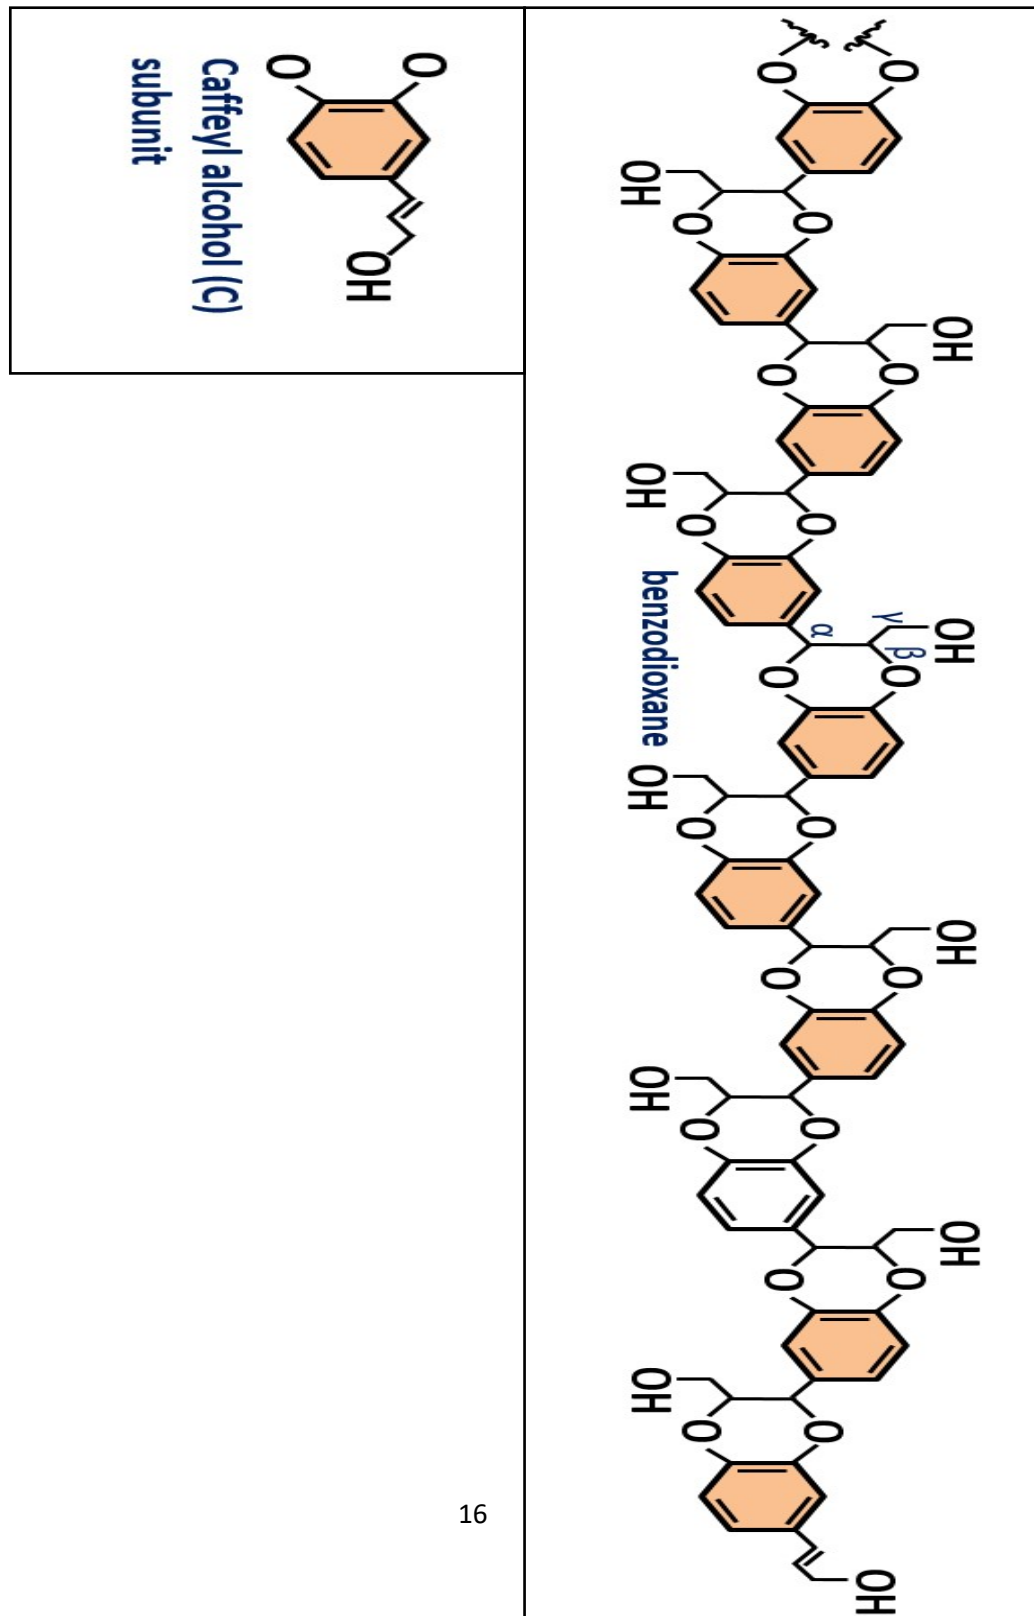



287

288

289

290

291 Fig. S6. The structure of C-lignin

## 292 **11. Economics of the PEM electrolyzer**

293 The economics of H<sub>2</sub> production by the PEM electrolyzer can be defined by

294 the capital cost ( $C_{H_2}$ ) [52, 53]. In this study, the capital costs include the cost

295 of the electrolyzer ( $C_{elec}$ ) plus that of the inserted PEM ( $C_{PEM}$ ) as presented

296 in equation S11 [54, 53]. The detailed costs of the electrolyzer and the

297 materials used to fabricate the PEMs are shown in Table S6. The initial

298 capital cost ( $C_{H_2}$ ) normalized by the experimental hydrogen volume

299 produced ( $V_{H_2(produced)} = 4.77 \text{ mL}$ ) was calculated according to equation

300 S12 and the  $C_{H_2}$  values are shown in Table S7 [55].

301

$$C_{H_2} = C_{elec} + C_{PEM} \quad \text{S11}$$

302

$$C_{H_2R} = \frac{C_{H_2}}{V \text{ (mL)}} \quad \text{S12}$$

303

304 **Table S6: Cost of the materials used for electrolysis**

| Materials                      | Quantity used | Rate (\$)               | Cost (\$) |
|--------------------------------|---------------|-------------------------|-----------|
| Electrolyzer (elec.)           | 1 elec.       | 163.77 \$/elec.         | 163.77    |
| Nafion 115                     | 5.8cm × 4.6cm | 0.18 \$/cm <sup>2</sup> | 4.80      |
| Polyvinyl alcohol<br>(PVA)     | 5g            | 0.05 \$/g               | 0.25      |
| Polyvinyl pyrrolidone<br>(PVP) | 5g            | 0.13/g                  | 0.65      |
| Sulfocinic acid (SSA)          | 2.45ml        | 0.44 \$/ml              | 1.08      |

|                                        |                                           |           |      |
|----------------------------------------|-------------------------------------------|-----------|------|
| Asahi Silicon defoamer                 | 0.5g                                      | 0.02 \$/g | 0.01 |
| Water (PEM preparation + electrolysis) | 500ml                                     |           |      |
| Fillers (CT and PB)                    | Obtained from their tree sources for free |           |      |

305

306 The normalized capital cost  $C_{H_2R}$  was reported with respect to the PEM  
307 inserted in the electrolyzer (Table S7). Electrolysis is costly when using NF-  
308 M as opposed to other PEMs (SSA-M, PB-M and CT-M). The economic cost  
309 for H<sub>2</sub> using NF-M was approximately 35.34 \$/mL H<sub>2</sub> whereas that of the  
310 SSA-M, PB-M and CT-M was 34.75 \$/mL H<sub>2</sub>. These cost differences are  
311 mainly due to the fact that no filler was used in SSA-M whereas the fillers  
312 used in PB-M and CT-M were free because they were obtained directly from  
313 their respective trees. Comparatively, the fabricated PEMs were cheaper than  
314 the commercial NF-M, therefore they are recommended.

315

316 **Table S7: Capital cost and normalized capital cost calculation based**  
317 **on PEM type used and experimental H<sub>2</sub> volume produced**

| Reactor                 | PEM type | Cost of Elec. + PEM (\$) | $C_{H_2}$ (\$/mL H <sub>2</sub> ) |
|-------------------------|----------|--------------------------|-----------------------------------|
| Electrolyzer<br>(elec.) | NF-M     | 168.57                   | 35.34                             |
|                         | SSA-M    | 165.76                   | 34.75                             |
|                         | PB-M     | 165.76                   | 34.75                             |
|                         | CT-M     | 165.76                   | 34.75                             |

318

## 319 12. SEM characterization for the electrodes

320 The results (Fig. S7) displayed and verified the manufacturer's specifications  
321 of the electrolyzer (Table 3 in the main text). Focusing on the H<sub>2</sub>-producing  
322 electrode (cathode), Nickel was detected in a larger proportion (94.3 wt%,  
323 Fig. S7. c). For the O<sub>2</sub> electrode, small spherical and chain-like particles are  
324 visible on the surface, they mainly the platinum particles on the titanium  
325 surface (Fig. S7. d and e). These SEM results are in correspondence to the  
326 manufacturer's information, which indicated that nickel and platinum-plated  
327 titanium were used as cathode and anode materials respectively (Table 3 in  
328 the main text).

329

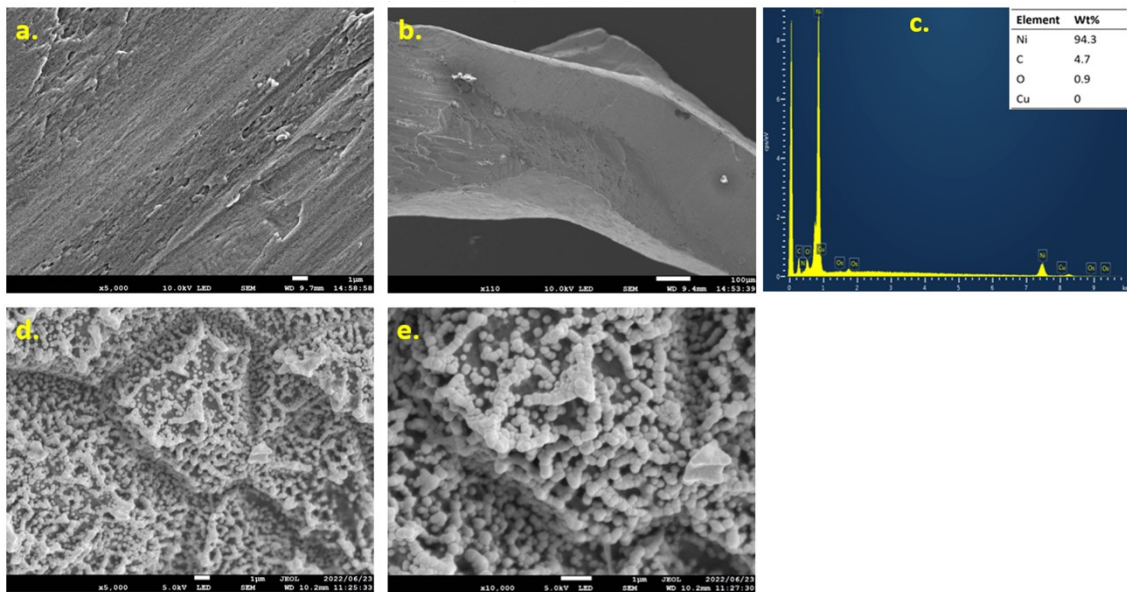

330

331 Fig. S7. SEM images of the electrodes including cathode (a and b) and  
 332 EDX of the cathode (d) as well as the anode SEM images (d and e) at  
 333 resolutions of 1 $\mu$ m and 100  $\mu$ m

334

### 335 13. PV powered electrolysis

336 In the case where the power source is a PV cell, additional to the PV cell  
 337 efficiency is defined by the ratio of the power output ( $P_{out}$ ) to that of the  
 338 power input ( $P_{in}$ ) whereby  $P_{in}$  is the irradiance ( $IR = 1000 \text{ W/m}^2$ ) and cell  
 339 area product ( $CA$ ) [56, 57].

340

$$\eta_{SP} = \frac{P_{out}}{P_{in}} = \frac{P_{max}}{P_{in}} = \frac{P_{max}}{P_{in}} = \frac{P_{max}}{I_R * CA} \times 100 \quad \text{S13}$$

341

342

344 **References**

- 345 [1] H. Zhang, G. Lin, J. Chen. Evaluation and calculation on the efficiency  
346 of a water electrolysis system for hydrogen production. *International journal*  
347 *of hydrogen Energy* 35 (2010) 10851-10858.
- 348 [2] G. Chisholm. L. Cronin. Chapter 16 - Hydrogen From Water  
349 Electrolysis. *Storing Energy (With Special Reference to Renewable Energy*  
350 *Sources)* (2016) 315-343.
- 351 [3] S. Pascuzzi, A. S. Anifantis, I. Blanco and G. S. Mugnozza. Electrolyzer  
352 Performance Analysis of an Integrated Hydrogen Power System for  
353 Greenhouse Heating. A Case Study. *Sustainability* 8 (2016) 629
- 354 [4] M. Hammoudi, C. Henao, K. Agbossou, Y. Dubé, M. L. Doumbia. New  
355 multi-physics approach for modelling and design of alkaline electrolyzers.  
356 *Int. J. Hydrog. Energy* 2012, 37, 13895–13913.
- 357 [5] H. Ganjehsarabi. Performance assessment of solar-powered high  
358 pressure proton exchange membrane electrolyzer: A case study for Erzincan.  
359 *International journal of hydrogen energy* 44 (2019) 9701-9707.
- 360 [6] H. Görgün. Dynamic modelling of a proton exchange membrane (PEM)  
361 electrolyzer. *International Journal of Hydrogen Energy* 31 (2006) 29 - 38.
- 362 [7] F. M. Nafchi, E. Baniasadi, E. Afshari, N. Javani. Performance assessment  
363 of a solar hydrogen and electricity production plant using high temperature  
364 PEM electrolyzer and energy storage. *International Journal of Hydrogen*  
365 *Energy* 43 (2018) 5820-5831.
- 366 [8] J. Yu, G. Jung, Y. Su, C. Yeh, M. Kan, C. Lee, C. Lai. Proton exchange  
367 membrane water electrolysis system membrane electrode assembly with  
368 additive. *International Journal of Hydrogen Energy* 2019;44:15721-15726.
- 369 [9] I. Papagiannakis. Studying and improving the efficiency of water  
370 electrolysis using a proton exchange membrane electrolyser. *Strathclyde*  
371 *University: 2005, p 57-68.*
- 372 [10] M. E. Argun, S. Dursun, M. Karata. Removal of Cd(II), Pb(II), Cu(II)  
373 and Ni(II) from water using modified pine bark. *Desalination* 249 (2009)  
374 519-527.

- 375 [11] L. Chupin, C. Motillon, F. C. Bouhtoury, A. Pizzi, B. Charrier.  
376 Characterisation of maritime pine (*Pinus pinaster*) bark tannins extracted  
377 under different conditions by spectroscopic methods, FTIR and HPLC.  
378 *Industrial Crops and Products* 49 (2013) 897- 903.
- 379 [12] A. L. Arim, K. Neves. M. J. Quina, L. M. Gando-Ferreir. Experimental  
380 and mathematical modelling of Cr(III) sorption in fixed-bed column using  
381 modified pine bark. *Journal of cleaner production* 183 (2018) 272-281.
- 382 [13] A. L. Arim, M. J. Quina, L. M. Gando-Ferreira. Uptake of trivalent  
383 chromium from aqueous solutions by xanthate pine bark: Characterization,  
384 batch and column studies. *Process Safety and Environmental Protection* 121  
385 (2019) 374-386.
- 386 [14] A. Gundogdu, D. Ozdes, C. Duran, V. N. Bulut, M. Soylak, H. B.  
387 Senturk. Biosorption of Pb(II) ions from aqueous solution by pine bark  
388 (*Pinus brutia* Ten.). *Chemical Engineering Journal* 153 (2009) 62–69.
- 389 [15] Y. Zhao, N. Yan, M. W. Feng. Thermal degradation characteristics of  
390 phenol-formaldehyde resins derived from beetle infested pine barks.  
391 *Thermochimica Acta* 555 (2013) 46-5.
- 392 [16] N. A. H. Rosli, K. S. Loh, W. Y. Wong, T. K. Lee and A. Ahmad.  
393 Hybrid Composite Membrane of Phosphorylated Chitosan/Poly (Vinyl  
394 Alcohol)/Silica as a Proton Exchange Membrane. *Membranes* 11 (2021)  
395 675.
- 396 [17] H. Toribio-Cuaya, L. Pedraza-Segura, S. Macías-Bravo, I. Gonzalez-  
397 García, R. Vasquez-Medrano, E. Favela-Torres. Characterization of  
398 Lignocellulosic Biomass Using Five Simple Steps. *JCBPS; Section D: Dev.*  
399 *of Biotechno. Process; Special Issue; 4* (2014) 28-47.
- 400 [18] F. Rahmawati, A. F. Ridassepri, Chairunnisa, A. T. Wijayanta, K.  
401 Nakabayashi, J. Miyawaki, T. Miyazaki. Carbon from Bagasse Activated  
402 with Water Vapor and Its Adsorption Performance for Methylene Blue.  
403 *Appl. Sci.* 2021, 11, 678.
- 404 [19] M. M. Gomaa, C. Hugenschmidt, M. Dickmann, E. E. Abdel-Hady, H.  
405 F. M. Mohamed and M. O. Abdel-Hamed. Crosslinked PVA/SSA proton  
406 exchange membranes: correlation between physiochemical properties and  
407 free volume determined by positron annihilation spectroscopy. *Phys. Chem.*  
408 *Chem. Phys.*, 20 (2018) 28287-28299.

- 409 [20] K. S. W. Sing, D. H. Everett, R. A. W. Haul, L. Moscou, R. A. Pierotti,  
410 J. Rouquerol, T. Siemieniowska. Reporting Physisorption Data for Gas/solid  
411 Systems with Special Reference to the Determination of Surface Area and  
412 Porosity. *Pure & App. Chem.*, 57 (1985) 603-619.
- 413 [21] B. Alagappan. Assessing Different Zeolitic Adsorbents for their  
414 Potential Use in Kr and Xe Separation. University of Nevada, Las Vegas  
415 (2013) 19-25.
- 416 [22] M. Thommes, K. Kaneko, A. V. Neimark, J. P. Olivier, F. Rodriguez-  
417 Reinoso, J. Rouquerol and K. S. W. Sing. Physisorption of gases, with  
418 special reference to the evaluation of surface area and pore size distribution  
419 (IUPAC Technical Report). *Pure Appl. Chem.* 87 (2015) 1051-1069.
- 420 [23] A. A. Sapalidis, F. K. Katsaros, and N. K. Kanellopoulos. PVA /  
421 Montmorillonite Nanocomposites: Development and Properties in  
422 Nanocomposites and Polymers with Analytical Methods. London, United  
423 Kingdom: IntechOpen, 2011 [Online]. Available:  
424 <https://www.intechopen.com/chapters/17185> doi: 10.5772/18217.
- 425 [24] C. Liu, C. Dai, C. Chao, S. Chang. Novel proton exchange membrane  
426 based on crosslinked poly (vinyl alcohol) for direct methanol fuel cells.  
427 *Journal of Power Sources* 249 (2014) 285-298.
- 428 [25] D. Ebenezer, A. P. Deshpande, P. Haridoss. Cross-linked poly (vinyl  
429 alcohol)/sulfosuccinic acid polymer as an electrolyte/electrode material for  
430 H<sub>2</sub>-O<sub>2</sub> proton exchange membrane fuel cells. *Journal of Power Sources* 304  
431 (2016) 282-292.
- 432 [26] M. F. A. Kamaroddin, N. Sabli, P. M. Nia, T. A. T. Abdullah, L. C.  
433 Abdullah, S. Izhar, A. Ripin, A. Ahmad. Phosphoric acid doped composite  
434 proton exchange membrane for hydrogen production in medium temperature  
435 copper chloride electrolysis. *International journal of hydrogen energy* 45  
436 (2020) 22209-22222.
- 437 [27] T. Kamjornsupamitr, T. Sangthumchai, S. Youngme, S. Martwiset.  
438 Proton conducting composite membranes from crosslinked poly(vinyl  
439 alcohol) and poly(styrenesulfonic acid)-functionalized silica nanoparticles.  
440 *International journal of hydrogen energy* 43 (2018) 1119 0-11201.
- 441 [28] J. Rhim, H. B. Park, C. Lee, J. Jun, D. S. Kim, Y. M. Lee. Crosslinked  
442 poly(vinyl alcohol) membranes containing sulfonic acid group: proton and

443 methanol transport through membranes. *Journal of Membrane Science* 238  
444 (2004) 143–151.

445 [29] S. Tasarin, C. Panawong, J. Sumranjit, S. Budsombat. Enhancement of  
446 proton conductivity of crosslinked poly(vinyl alcohol) through introduction  
447 of zeolitic imidazolate framework-8 and imidazole. *International journal of*  
448 *hydrogen energy* 46 (2021) 36969-36981.

449 [30] L. Zhu, Y. Li, J. Liu, J. He, L. Wang, J. Lei. Recent developments in  
450 high-performance Nafion membranes for hydrogen fuel cells applications.  
451 *Petroleum Science* 19 (2022) 1371-1381.

452 [31] J. E. Park, J. Kim, J. Han, K. Kim, S. Park, S. Kim, H. S. Park, Y. Cho,  
453 J. Lee, Y. Sung. High-performance proton-exchange membrane water  
454 electrolysis using a sulfonated poly(arylene ether sulfone) membrane and  
455 ionomer. *Journal of Membrane Science* 620 (2021) 118871.

456 [32] D. J. Kim, M. J. Jo, S. Y. Nam. A review of polymer-nanocomposite  
457 electrolyte membranes for fuel cell application. *Journal of Industrial and*  
458 *Engineering Chemistry* 21 (2015) 36-52.

459 [33] K. Charradi, Z. Ahmed, R. E. Cid, P. Aranda, E. Ruiz-Hitzky, P. Ocon,  
460 R. Chtourou. Amelioration of PEMFC performance at high temperature by  
461 incorporation of nanofiller (sepiolite/layered double hydroxide) in Nafion  
462 membrane. *International Journal of Hydrogen Energy* 44 (2019) 10666-  
463 10676.

464 [34] H. C. Lee, H. S. Hong, Y. Kim, S. H. Choi, M. Z. Hong, H. S. Lee, K.  
465 Kim. Preparation and evaluation of sulfonated-fluorinated poly (arylene  
466 ether)s membranes for a proton exchange membrane fuel cell (PEMFC).  
467 *Electrochimica Acta* 49 (2004) 2315–2323.

468 [35] M. Nishihara, Y. Terayama, T. Haji, S. M. Lyth, S. Satokawa, H.  
469 Matsumoto. Proton-conductive nano zeolite-PVA composite film as a new  
470 water-absorbing electrolyte for water electrolysis. *eXPRESS Polymer*  
471 *Letters* Vol.12, No.3 (2018) 256-264.

472 [36] P. Kulasekaran, B. M. Mahimai, P. Deivanayagam. Novel cross-linked  
473 poly(vinyl alcohol)-based electrolyte membranes for fuel cell applications.  
474 *RSC Adv.* 10 (2020) 26521-26527.

- 475 [37] L. M. T. Duarte, G. M. D. Almaraz, C. J. T. Pacheco. Fatigue tests on  
476 the proton exchange membrane Nafion 115 (perfluorosulfonic acid) of fuel  
477 cells, under the biaxial modality: Tension and torsion. *Materials Science for*  
478 *Energy Technologies 2* (2019) 22-28.
- 479 [38] J. S. Artimani, M. Arjomand, M. Enhessari, M. Javanbakht. Proton  
480 Conducting Nanocomposite Membranes Based on Poly Vinyl Alcohol  
481 (PVA) / Glutaraldehyde (GA) for Proton Exchange Membrane Fuel Cells.  
482 *Iran. J. Chem. Chem. Eng.* 40 (2021).
- 483 [39] B. Zhou, H. Pu, H. Pan, D. Wan. Proton exchange membranes based  
484 on semi-interpenetrating polymer networks of Nafion and poly(vinylidene  
485 fluoride) via radiation crosslinking. *International Journal of Hydrogen*  
486 *Energy 36* (2011) 6809-6816.
- 487 [40] E. Hago and X. Li. Interpenetrating Polymer Network Hydrogels  
488 Based on Gelatin and PVA by Biocompatible Approaches: Synthesis and  
489 Characterization. *Advances in Materials Science and Engineering*. 2013,  
490 32876.
- 491 [41] J. Y. Yoon, H. Zhang, Y. K. Kim, D. Harbottle, J. W. Lee. A high-  
492 strength polyvinyl alcohol hydrogel membrane crosslinked by sulfosuccinic  
493 acid for strontium removal via filtration. *Journal of Environmental*  
494 *Chemical Engineering 7* (2019) 102824.
- 495 [42] M. Kurniati, I. Nuraini, and C. Winarti. Investigation of Swelling  
496 Ratio and Textures Analysis of Acrylamide-Nanocellulose Corncoobs  
497 Hydrogel. *Journal of Physics: Conference Series 1805* (2021) 012036.
- 498 [43] A. Elzubair, J. C. M. Suarez, C. M. C. Bonelli, E. B. Mano. Gel  
499 fraction measurements in gamma-irradiated ultra high molecular weight  
500 polyethylene. *Polymer Testing 22* (2003) 647-649  
501
- 502 [44] F. Gulenoor, P. Poddar, M. D. I. Bossunia, N. C. Dafader, A. M. S.  
503 Chowdhury.  $\gamma$ -Irradiated Polyvinyl Alcohol (PVA) and Citric Acid Blend  
504 Hydrogels: Swelling and Absorption Properties. *Chem Sci J 7* (2016)  
505 1000125.
- 506 [45] S. J. Peighamardoust, S. Rowshanzamir, M. Amjadi. Review of the  
507 proton exchange membranes for fuel cell applications. *International Journal*  
508 *of Hydrogen Energy 35* (2010) 9348-9384.



509

510 [46] J. Luo, S. Lindsey. The use of pine bark and natural zeolite as biofilter  
511 media to remove animal rendering process odours. *Bioresource Technology*  
512 97 (2006) 1461-1469.

513 [47] T. Liu, X. Hui, W. Zhou, Y. Xiao, B. Tang, H. Xiao, J. Lv , L. Xi, G.  
514 Li. Dynamics of airborne bacterial community during biofiltration of gases  
515 from a swine house. *Science of the Total Environment* 740 (2020) 139898.

516 [48] R. Gloukhovski, V. Freger and Y. Tsur. Understanding methods of  
517 preparation and characterization of pore-filling polymer composites for  
518 proton exchange membranes: a beginner's guide. *Rev Chem Eng* 2018;  
519 34(4): 455-479.

520 [49] T. L. Eberhardt, X. Li, T. F. Shupe and C. Y. Hse. Chinese tallow tree  
521 (*Sapiumsebiferum*) utilization: Characterization of extractives and cell-wall  
522 chemistry. *Wood and Fiber Science* 39 (2007) pp 319-324.

523 [50] X. Yang, H. Pan, T. Zeng, T. F. Shupe, C. Hse. Extraction and  
524 Characterization of Seed Oil from Naturally Grown Chinese Tallow Trees.  
525 *J Am Oil Chem Soc* (2013) 90:459-466.

526 [51] S. Su, Q. Shen, S. Wang, G. Song. Discovery, disassembly,  
527 depolymerization and derivatization of catechyl lignin in Chinese tallow  
528 seed coats. *International Journal of Biological Macromolecules*. 239 (2023)  
529 124256.

530 [52] D. Peterson, J. Vickers, D. DeSantis. Hydrogen Production Cost From  
531 PEM Electrolysis. DOE Hydrogen and Fuel Cells Program Record (2020)  
532 19009.

533 [53] Y. Wang, C. Wen, J. Tu, Z. Zhan, B. Zhang, Q. Liu, Z. Zhang, H. Hu,  
534 T. Liu. The multi-scenario projection of cost reduction in hydrogen  
535 production by proton exchange membrane (PEM) water electrolysis in the  
536 near future (2020–2060) of China. *Fuel* 354 (2023) 129409.

537 [54] A. Mayyas, M. Ruth, B. Pivovar, G. Bender, K. Wipke. Manufacturing  
538 Cost Analysis for Proton Exchange Membrane Water Electrolyzers. Golden,  
539 CO: National Renewable Energy Laboratory. NREL/TP-6A20-72740.

540

541 [55] M. J. Ginsberg. Reducing the Production Cost of Hydrogen from  
542 Polymer Electrolyte Membrane Electrolyzers through Current Density  
543 Operation. Doctoral dissertation, Columbia University (2023) p130.

544 [56] R. Martinez, E. Forero. Estimation of energy efficiency in solar  
545 photovoltaic panels considering environmental variables. IOP Conf. Series:  
546 Materials Science and Engineering 437 (2018) 012008.

547 [57] S. K. Singh, N. Chander. Mid-life degradation evaluation of  
548 polycrystalline Si solar photovoltaic modules in a 100 kWp grid-tied system  
549 in east-central India. Renewable Energy 199 (2022) 351-367.

550

551

552

553

554

555

556

557

558
